# Supplementary material
Source: PubMed Central journal article supplement (PMC4229385)

**SUPPLEMENTAL MATERIAL**

**Supplemental Table 1: GRK phosphorylation-deficient V1AR primers**

| <b>Phospho-site</b>       | <b>Nucleotide mutations</b>       | <b>Sequence (sense top/antisense bottom)</b>                                                                                                |
|---------------------------|-----------------------------------|---------------------------------------------------------------------------------------------------------------------------------------------|
| S352                      | a1054g, g1055c                    | 5'-gctgtaatccctggatatacatgtttttgctggccatctccttca-3'<br>5'-tgaaggagatggccagcaaaaaacatgtatatccagggattacagc-3'                                 |
| S362                      | a1084g, g1085c                    | 5'-ccttcaagactgtgttcaagccttcccatgctgcccacaaac-3'<br>5'-gttttggcagcatgggaaggctgaacacagctcttgaagg-3'                                          |
| T378, S380                | a1132g, a1138g,<br>g1139c         | 5'-acatgaaggaaaaattcaacaaagaagatgctgacgctatgagcagaagacagactttttattc-3'<br>5'-gaataaaaagtctgtcttctgctcatagcgtcagcatcttcttgaatttttcttcatgt-3' |
| S382                      | a1144g, g1145c                    | 5'-aagaagatgctgacgctatggccagaagacaggctttttatg-3'<br>5'-cataaaaagcctgtcttctggccatagcgtcagcatcttctt-3'                                        |
| T386, S389                | a1156g, t1165g                    | 5'-agaagatactgacagtatggccagaagacaggctttttatgctaacaatcgaagcccaac-3'<br>5'-gttgggcttcgattgttagcataaaaagcctgtcttctggccatactgtcagtatcttct-3'    |
| S393, T395                | a1177g, g1178c,<br>a1183g         | 5'-cacataccgcagcgtttgctggggctcgattgttagcataaaaa-3'<br>5'-ttttatgctaacaatcgagcccagcaaacgctcgggtatgtg-3'                                      |
| S397, T398                | a1189g, g1190c,<br>a1192g         | 5'-aacaatcgaagcccaacaaacgctcgggtatgtggaaggactc-3'<br>5'-gagtcctccacataaccgcagcgtttgttgggcttcgattgtt-3'                                      |
| S404, S407,<br>S408, S410 | t1210g, t1219g,<br>t1222g, t1228g | 5'-cgggtatgtggaaggacgcctaaagctgccaaggccatcaaattcattcct-3'<br>5'-aggaatgaattgatggccttggcagctttaggcgctctccacataaccg-3'                        |
| S417, T418                | t1249g, a1252g                    | 5'-ccatcaaattcattcctgttgacgcttgactcgagtctagagg-3'<br>5'-cccttagactcgagtcaagctgcaacaggaatgaattgatgg-3'                                       |

**Supplemental Fig. 1:** A) Heart rate to body weight ratios of TAC mice  $\pm$  SR 49059. \*\*\* $p < 0.01$ , one-way ANOVA with Bonferroni multiple comparisons test (6 total comparisons). B) Serial changes in LV mass in response to TAC  $\pm$  SR 49059 as determined by echocardiography. \*\* $p < 0.01$ , \*\*\* $p < 0.001$  TAC+V versus Sham+V, † $p < 0.05$ , †† $p < 0.01$ , ††† $p < 0.001$  TAC+SR versus Sham+V at corresponding weeks, two-way repeated measures ANOVA with Bonferroni multiple comparisons test (6 comparisons total). N = 9 (Sham+V), 8 (Sham+SR), 13 (TAC+V), 14 (TAC+SR). C) Summary of the changes in  $Ca^{2+}$  transients in adult mouse cardiomyocytes in response to increasing concentrations of AVP. N = 5 (0-100 nM AVP), 3 (1000 nM AVP).

**Supplemental Fig. 2:** A) AFVM infected with Ad-ICUE3 were stimulated with ISO (100nM) alone or following pretreatment with ICI 118,551 ( $\beta$ 2AR-selective inhibitor, 100nM) or CGP 20712A ( $\beta$ 1AR-selective inhibitor, 100nM). B) %AUC summary of the data in (A) indicating that the ISO-mediated cAMP increase observed in AFVM is predominantly  $\beta$ 1AR-dependent. \*\*\* $p < 0.001$ , ns = not significant, one-way ANOVA with Bonferonni multiple comparisons test (3 comparisons total). N= 14 (ISO), 19 (ICI 118,551+ISO), 16 (CGP 20712A+ISO). Human U2S osteosarcoma cells infected with Ad-ICUE3 were stimulated with 1 $\mu$ M ISO in the absence or presence of increasing concentrations of ICI 188,551 (C) or CGP 20712A (D). Pretreatment with ICI completely abolished the ISO-mediated increase in cAMP generation, while CGP was only able to block the ISO effect at 10 $\mu$ M, indicating that ISO-mediated cAMP generation in U2S cells is predominantly  $\beta$ 2AR-dependent. \*\*\* $p < 0.001$ , ns = not significant, one-way ANOVA with Bonferroni multiple comparisons test (21 comparisons total). N = 7 per treatment condition. E) U2S cells transfected with the diacylglycerol FRET reporter (DAGR) and HA-tagged V1AR were stimulated with 1 $\mu$ M AVP, showing a rapid DAG generation response to AVP in these cells. N = 26. F) U2S cells transfected with ICUE3 and V1AR were stimulated with increasing ISO concentrations  $\pm$  1 $\mu$ M AVP, revealing a concentration-dependent increase in ISO-mediated cAMP production that was not sensitive to AVP pretreatment. F) Concentration-response (%AUC) analysis demonstrate a lack of impact of V1AR signaling on  $\beta$ 2AR-mediated cAMP generation in U2S cells ( $EC_{50}$  of  $\sim$ 16nM ISO in both the presence or absence of AVP). N = 7-10 per treatment condition.

**Supplemental Figure 3:** A) HEK 293 cells transfected with V1AR and DAGR were stimulated with increasing concentrations of AVP, with the concentration-response curve shown in (B). N = 8-24 per treatment condition. C) HEK 293 stably overexpressing AT1R and transfected with DAGR were stimulated with increasing concentrations of Ang II, with the concentration-response curve shown in (D). N = 20-60 per treatment condition. E) Pretreatment of HEK 293 cells expressing AT1R,  $\beta$ 1AR and ICUE3 with Ang II (1 $\mu$ M) did not alter ISO (1nM)-mediated cAMP production, as summarized in (F). ns = not significant, two-tailed unpaired t-test. N = 21 (ISO), 22 (Ang II+ISO).

**Supplemental Fig. 4:** Radioligand binding of transiently transfected WT V1AR versus GRK<sup>-/-</sup>V1AR in HEK 293 cells shows similar levels of expression ( $B_{max}$ , A) and ligand affinity ( $K_d$ , B). N = 3 each. Radioligand binding of WT versus V1AR-TG mouse heart membrane preparations shows a five-fold increase in V1AR expression in the V1AR-TG hearts over WT levels (C) with similar ligand affinities in each heart genotype (D). \*\*\* $p < 0.001$ , ns = not significant, two-tailed unpaired t-test. N = 5 each. Cardiac contractile parameters were measured in ex vivo Langendorff preparations from WT mice. Infusion of increasing concentrations of AVP led to a small decrease in contractility in WT hearts as measured by LVDP (E), +dP/dt (F) and -dP/dt (G), expressed as % of baseline. N = 3 hearts.

Supplemental Figure 1

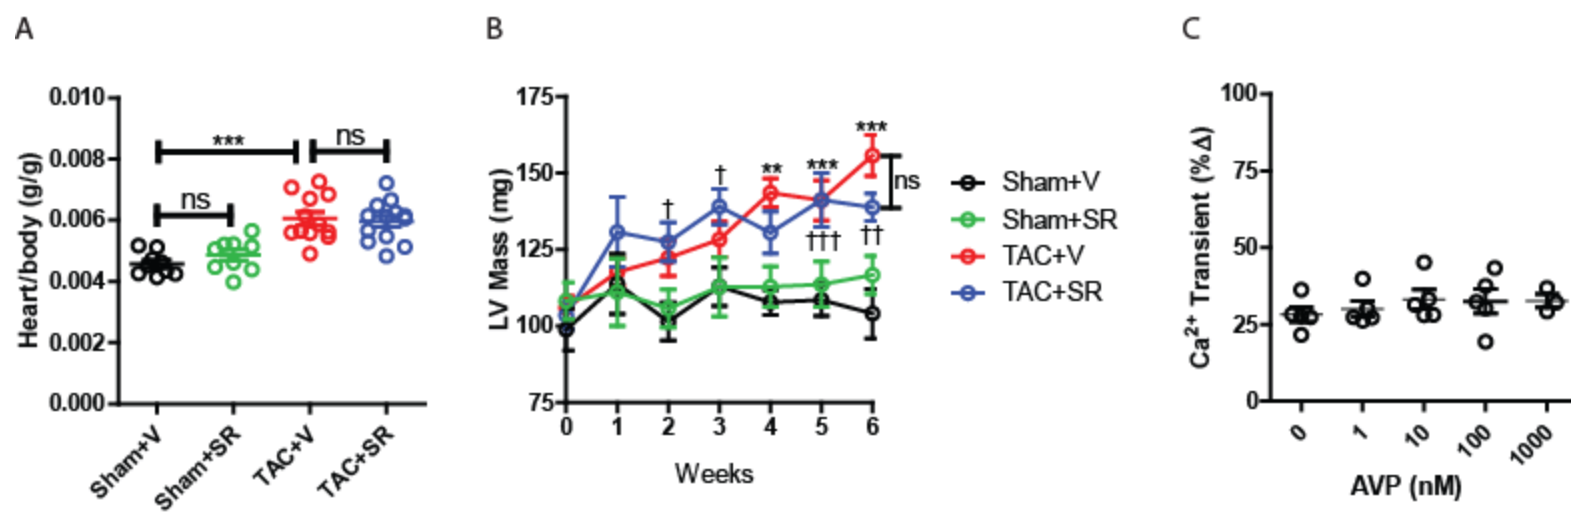

Supplemental Figure 2

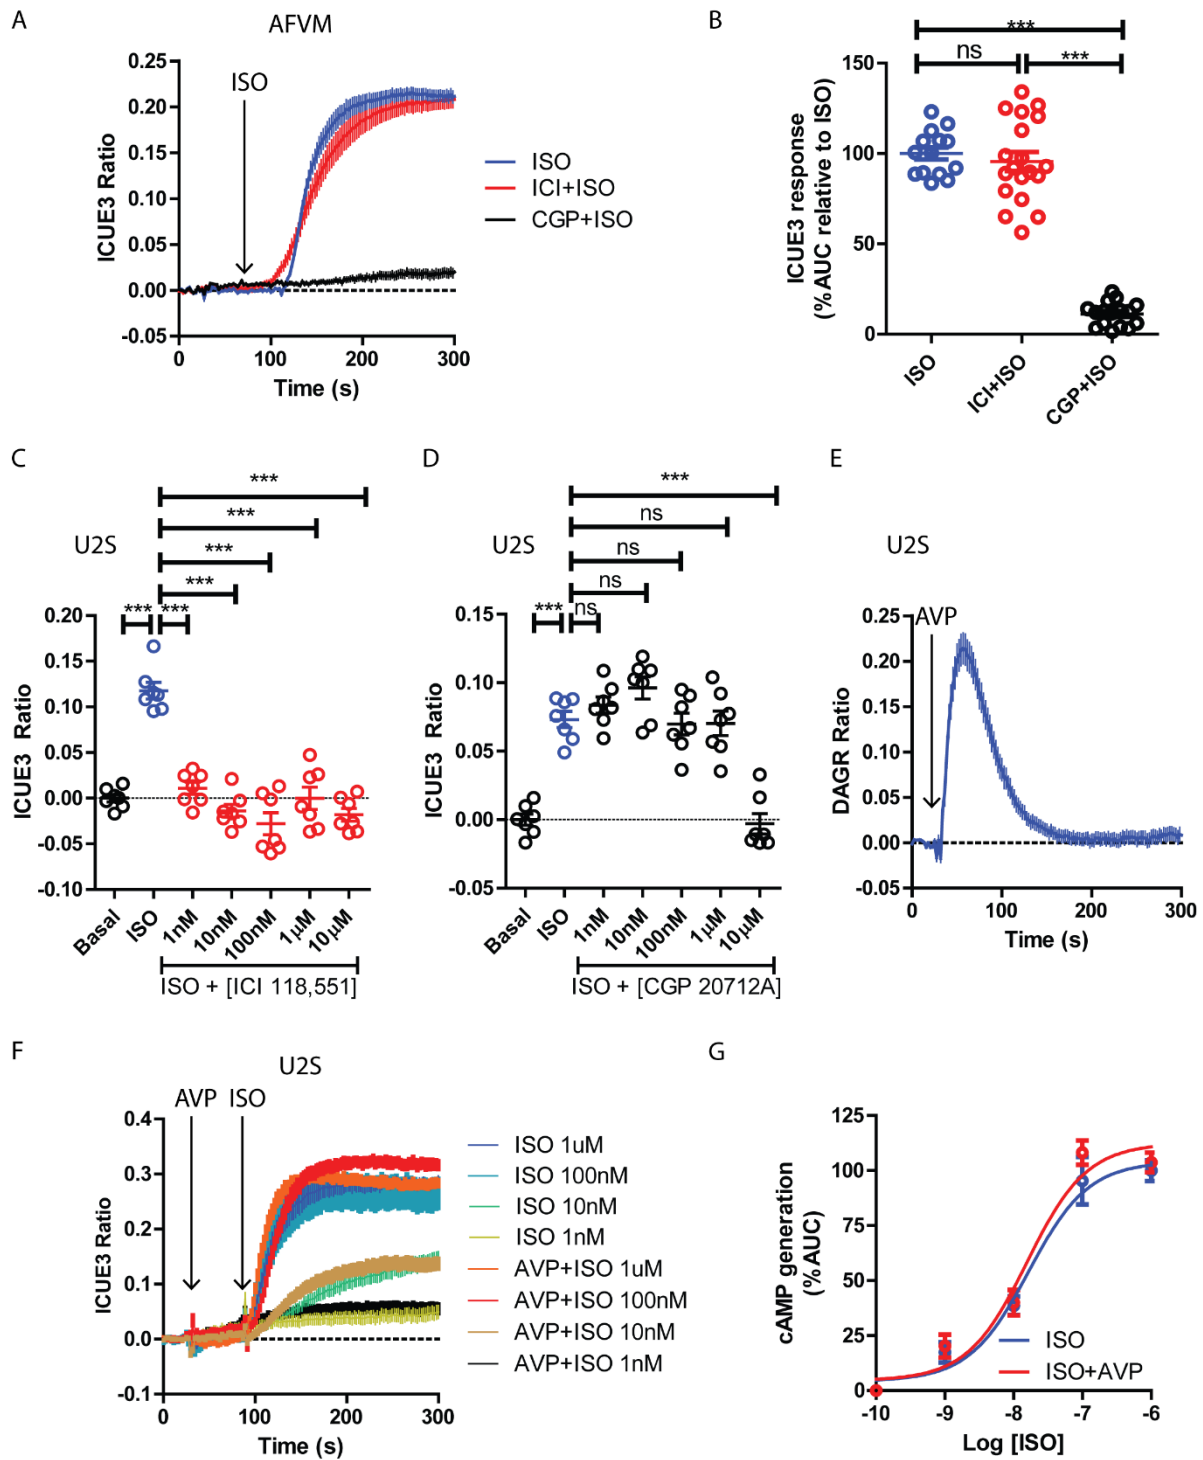

Supplemental Figure 3

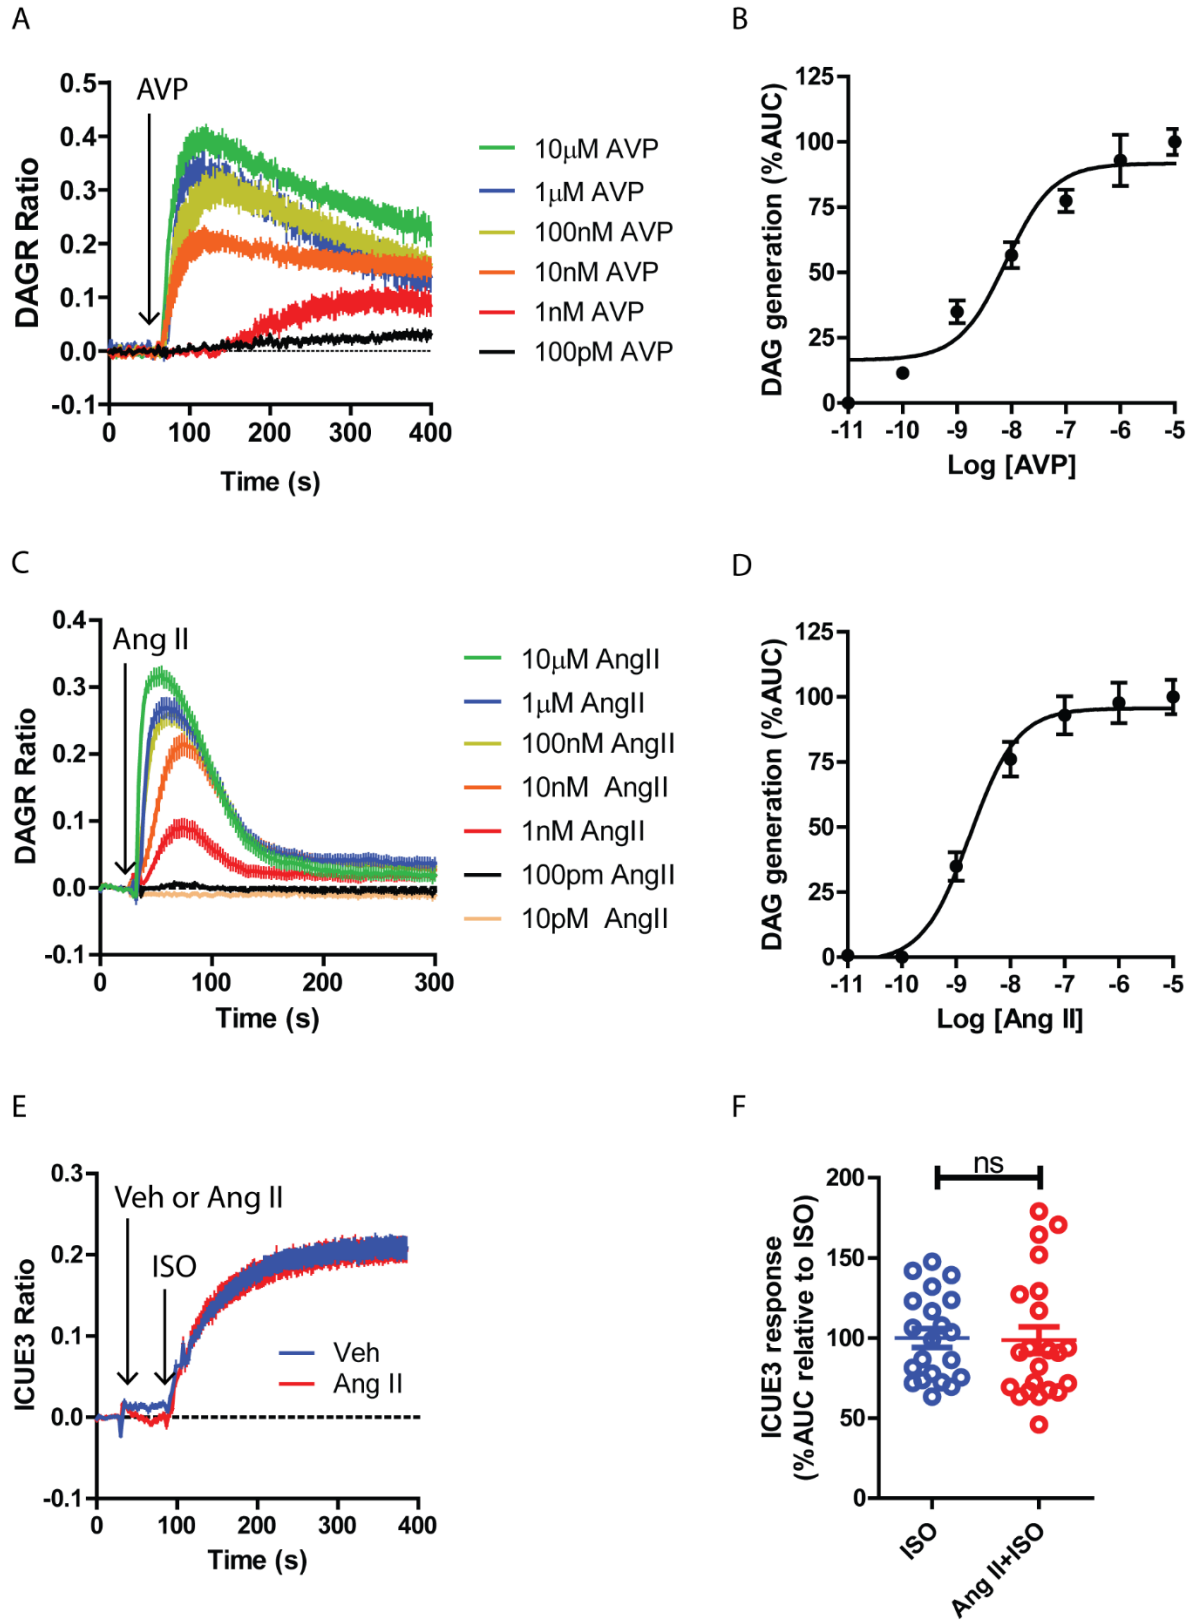



Supplemental Figure 4

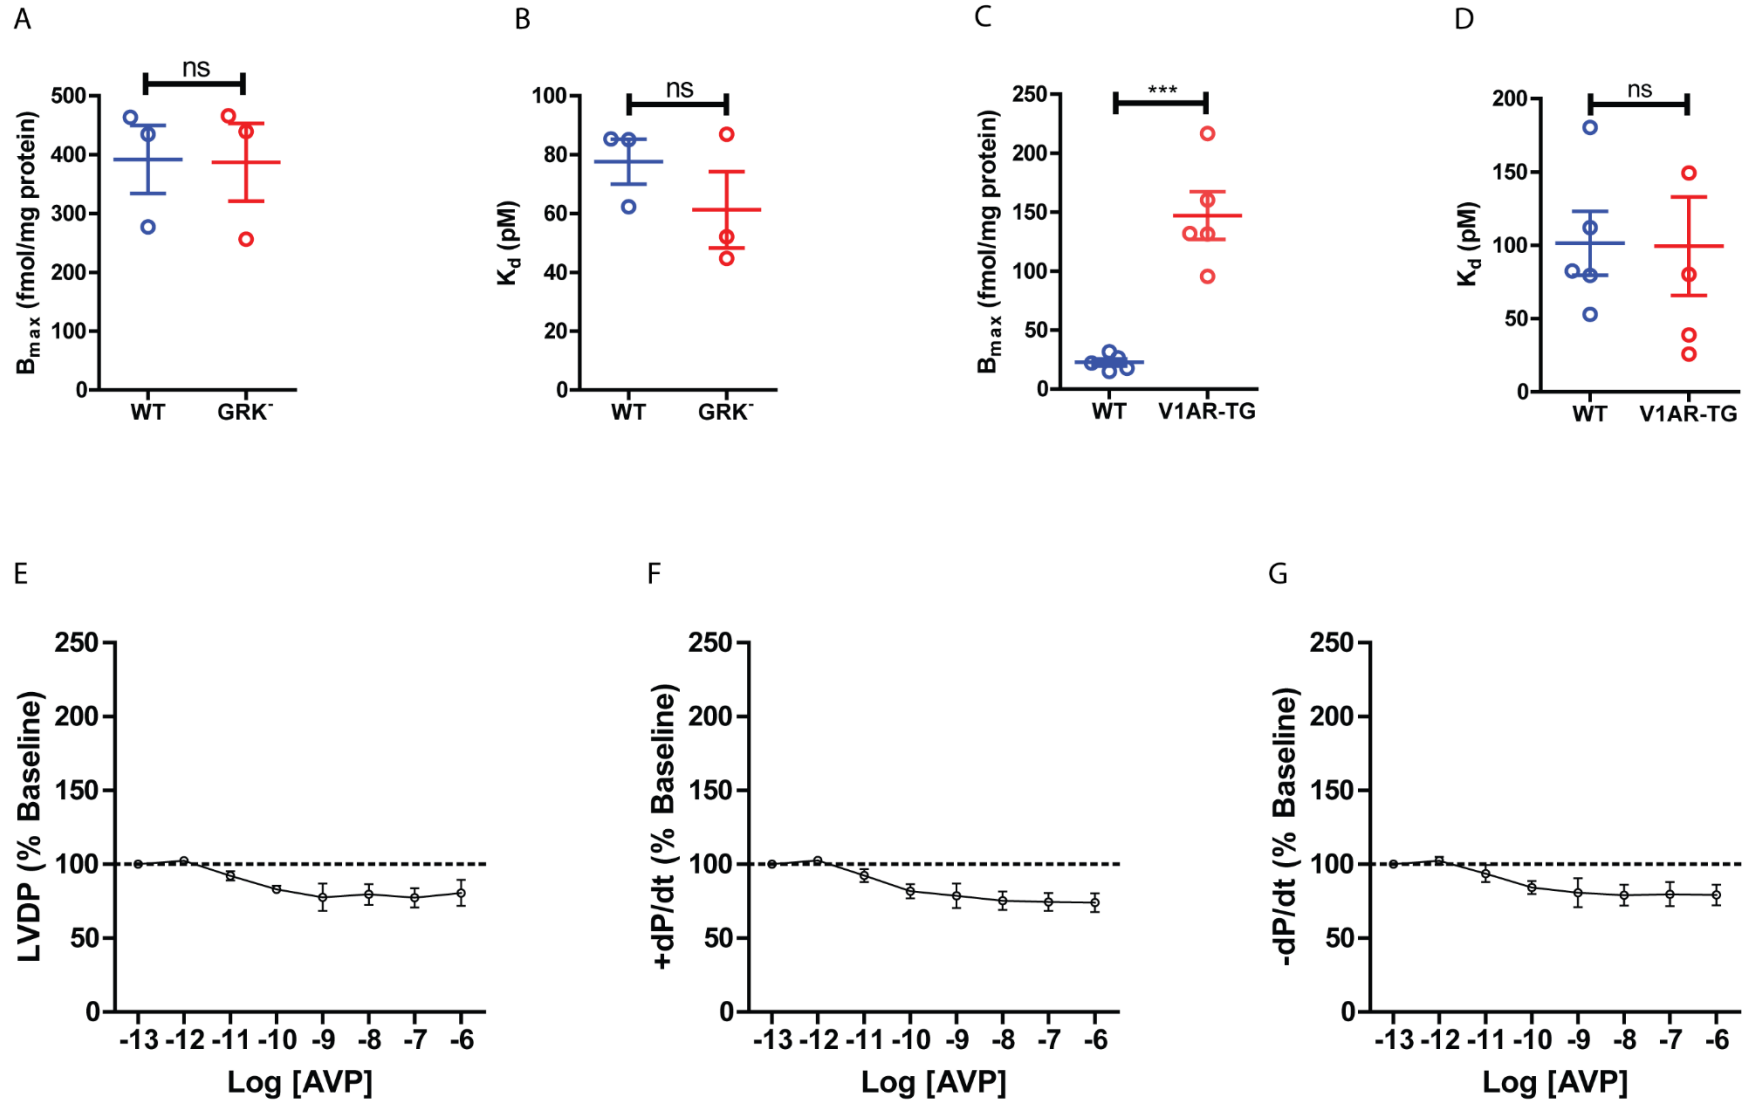

Supplement: NIHMS625774-supplement-Supplemental_Material.pdf [file NIHMS625774-supplement-Supplemental_Material.pdf]
